# Supplementary material for: Sigma-1 receptor is involved in diminished ovarian reserve possibly by influencing endoplasmic reticulum stress-mediated granulosa cells apoptosis
Source: publisher site journal article supplement (doi:10.18632/aging.103166), 2020-05-14
Supplement: Supplementary file [file aging-v12i10-103166-supplementary-material-SD1.pdf]

## SUPPLEMENTARY TABLES

**Supplementary Table 1. Different clinical characteristics between women with DOR and NOR ( $\bar{x} \pm s$ ).**

|                                             | Normal ovarian reserve<br>(NOR) (n = 84) | Diminished ovarian<br>reserve (DOR) (n = 46) | P       |
|---------------------------------------------|------------------------------------------|----------------------------------------------|---------|
| Age of patients (year)                      | 30.48±3.19                               | 36.83±5.46                                   | 0.000** |
| Duration of infertility (year)              | 3.20±1.70                                | 6.41±2.88                                    | 0.000** |
| Past NO. of IVF cycles                      | 1.20±0.55                                | 1.61±0.91                                    | 0.001** |
| Body mass index (BMI)                       | 23.35±3.45                               | 22.74±2.50                                   | 0.254   |
| Antral follicular count (AFC)               | 12.21±4.73                               | 4.22±1.66                                    | 0.000** |
| D3 FSH (IU/l)                               | 5.54±1.38                                | 10.38±4.69                                   | 0.000** |
| D3 LH (mIU/ml)                              | 5.67±3.83                                | 5.99±4.22                                    | 0.400   |
| Serum AMH (ng/ml)                           | 6.41±2.62                                | 1.30±0.97                                    | 0.000** |
| Dosage of gonadotropin initiating (IU)      | 167.26±54.29                             | 237.50±36.80                                 | 0.000** |
| Total dose of gonadotropin (IU)             | 1643.75±797.64                           | 1932.07±987.21                               | 0.073   |
| Duration of gonadotropin stimulation (days) | 7.86±3.01                                | 8.02±3.56                                    | 0.674   |
| Endometrial thickness on ET day(mm)         | 10.45±1.75                               | 10.17±1.81                                   | 0.346   |
| No. of oocyte retrieved                     | 11.89±6.23                               | 4.11±2.83                                    | 0.000** |
| No. of available embryos                    | 5.68±3.81                                | 1.74±1.64                                    | 0.000** |

\*\*<0.01.

**Supplementary Table 2. Low sigma-1 receptor protein in GCs of women with DOR ( $\bar{x} \pm s$ ).**

|                                         | Normal ovarian reserve (NOR)<br>group (n = 3) | Diminished ovarian reserve (DOR)<br>group (n = 3) | P      |
|-----------------------------------------|-----------------------------------------------|---------------------------------------------------|--------|
| The level of sigma-1<br>receptor in GCs | 183.01±15.07                                  | 107.81±21.94                                      | 0.006* |

\*<0.05.

**Supplementary Table 3. Low sigma-1 receptor concentration in FF and serum of women with DOR ( $\bar{x} \pm s$ ).**

|                                             | Normal ovarian reserve<br>(NOR) (n = 84) | Diminished ovarian reserve<br>(DOR) (n = 46) | P       |
|---------------------------------------------|------------------------------------------|----------------------------------------------|---------|
| The level of serum sigma-1 receptor (pg/ml) | 158.65±18.29                             | 129.17±29.48                                 | 0.000** |
| The level of FF sigma-1 receptor (pg/ml)    | 164.76±16.38                             | 130.90±18.88                                 | 0.000** |

\*\*<0.01.

**Supplementary Table 4. High apoptosis index in GCs of women with DOR ( $\bar{x} \pm s$ ).**

|                                | GCs of NOR group (n = 3) | GCs of DOR group (n = 3) | P       |
|--------------------------------|--------------------------|--------------------------|---------|
| Early stage apoptotic rate (%) | 10.42±1.46               | 21.21±1.75               | 0.001** |
| Late stage apoptotic rate (%)  | 17.95±0.35               | 22.44±2.32               | 0.030*  |
| Total Early apoptotic rate (%) | 28.37±1.16               | 43.65±2.00               | 0.000** |

\*<0.05; \*\*<0.01.

**Supplementary Table 5. The mRNA expression of apoptosis- and ERS-related genes in GCs of women with DOR ( $\bar{x} \pm s$ ).**

|                  | GCs of NOR group (n = 3) | GCs of DOR group (n = 3) | P       |
|------------------|--------------------------|--------------------------|---------|
| Sigma-1 receptor | 0.93±0.34                | 0.61±0.19                | 0.026*  |
| BIP              | 0.87±0.33                | 1.29±0.46                | 0.041*  |
| JNK              | 0.95±0.30                | 1.06±0.18                | 0.383   |
| caspase-12       | 0.97±0.26                | 1.24±0.20                | 0.223   |
| CHOP             | 1.18±0.34                | 1.72±0.49                | 0.038*  |
| ATF4             | 1.03±0.27                | 2.19±0.09                | 0.002** |
| ATF6             | 1.17± 0.34               | 1.93 ± 0.51              | 0.002** |
| BCL-2            | 1.03±0.21                | 0.79±0.16                | 0.015*  |
| BAX              | 0.99±0.16                | 1.40±0.12                | 0.034*  |
| BCL-2/BAX(%)     | 96.28±13.16              | 64.12±12.53              | 0.000** |

\*<0.05, \*\*<0.01.

**Supplementary Table 6. Clinical outcomes in women with DOR with and without DHEA supplementation ( $\bar{x} \pm s$ ).**

|                                     | control women (n = 58) | DHEA administration women (n = 31) | P      |
|-------------------------------------|------------------------|------------------------------------|--------|
| Age of patients (year)              | 36.00±5.88             | 36.32±5.75                         | 0.941  |
| Duration of infertility (year)      | 6.12±2.90              | 7.23±2.90                          | 0.106  |
| Past NO. of IVF cycles              | 1.53±0.84              | 1.61±0.95                          | 0.924  |
| Primary/secondary infertility       | 24/34                  | 16/15                              | 0.355  |
| Body mass index (BMI)               | 23.62±3.10             | 22.78±2.06                         | 0.181  |
| Antral follicular count (AFC)       | 3.81±1.65              | 4.13±1.94                          | 0.593  |
| D3 FSH (IU/l)                       | 9.70±3.25              | 10.79±4.58                         | 0.408  |
| D3 LH (mIU/ml)                      | 4.91±2.28              | 4.24±1.78                          | 0.238  |
| Serum AMH (ng/ml)                   | 1.09±0.83              | 0.86±0.60                          | 0.221  |
| Total dose of Gn (IU)               | 1712.93±666.12         | 1683.06±688.19                     | 0.843  |
| Duraion of Gn stimulation (days)    | 7.76±3.33              | 6.97±2.94                          | 0.653  |
| Endometrial thickness on ET day(mm) | 9.75±1.69              | 9.66±2.11                          | 0.384  |
| No. of oocyte retrieved             | 3.41±1.85              | 4.23±1.89                          | 0.098  |
| No. of available embryo             | 1.64±1.43              | 2.29±1.30                          | 0.044* |
| High quality embryo rate (%)        | 50.52 (48/95)          | 45.07 (32/71)                      | 0.486  |
| No. of embryo transferred           | 1.57±0.50              | 1.69±0.608                         | 0.573  |
| Cycle cancelation rate (%)          | 36.21 (21/58)          | 16.13 (5/31)                       | 0.047* |
| Clinical pregnancy rate (%)         | 29.63 (8/27)           | 35.71 (5/14)                       | 0.691  |
| Abortion rate (%)                   | 25.00 (2/8)            | 20.00 (1/5)                        | 1.000  |
| Ectopic pregnant rate (%)           | 12.50 (1/8)            | 0.00 (0/5)                         | 1.000  |

\*<0.05.

**Supplementary Table 7. Sigma-1 receptor protein levels in women with DOR with and without DHEA supplementation ( $\bar{x} \pm s$ ).**

|                                      | Control women (n = 3) | DHEA administration women (n = 3) | P     |
|--------------------------------------|-----------------------|-----------------------------------|-------|
| The level of sigma-1 receptor in GCs | 98.37±15.86           | 135.03±16.85                      | 0.052 |

**Supplementary Table 8. Low apoptosis index in women with DOR with DHEA supplementation ( $\bar{x} \pm s$ ).**

|                                | Control women (n = 3) | DHEA administration women (n = 3) | P       |
|--------------------------------|-----------------------|-----------------------------------|---------|
| Early stage apoptotic rate (%) | 21.34±1.76            | 17.50±1.31                        | 0.002** |
| Late stage apoptotic rate (%)  | 23.91±1.61            | 21.41±1.04                        | 0.088   |
| Total Early apoptotic rate (%) | 45.25±3.20            | 38.91±2.23                        | 0.048*  |

\*<0.05; \*\*<0.01.

**Supplementary Table 9. The mRNA expression in differently treated KGN cells ( $\bar{x} \pm s$ ).**

|                  | No drug group (n = 3) | DHEA treated group (n = 3) | RPE-084 treated group (n = 3) | pcDNA3.1(+) group (n = 3) | pcDNA3.1(+) SIGMAR1 group (n = 3) | NC shRNA group (n = 3) | SIGMAR1 shRNA group (n = 3) | P                                                                        |
|------------------|-----------------------|----------------------------|-------------------------------|---------------------------|-----------------------------------|------------------------|-----------------------------|--------------------------------------------------------------------------|
| sigma-1 receptor | 0.99±0.37             | 1.26±0.34                  | 1.83±0.56                     | 0.96±0.04                 | 268.22±23.28                      | 1.05±0.09              | 0.50±0.16                   | 0.040 <sup>#</sup><br>0.000 <sup>△</sup><br>0.014 <sup>†</sup>           |
| BIP              | 1.06±0.45             | 0.89±0.35                  | 0.85±0.64                     | 1.02±0.24                 | 0.89±0.16                         | 0.99±0.28              | 2.53±0.74                   | 0.016 <sup>†</sup>                                                       |
| JNK              | 0.98±0.28             | 0.91±0.23                  | 0.65±0.24                     | 1.02±0.06                 | 1.02±0.13                         | 0.99±0.08              | 1.22±0.29                   | >0.05                                                                    |
| caspase-12       | 1.02±0.08             | 0.76±0.19                  | 0.89±0.44                     | 0.99±0.02                 | 0.97±0.06                         | 1.06±0.37              | 1.65±0.52                   | >0.05                                                                    |
| CHOP             | 1.00±0.24             | 0.71±0.23                  | 0.51±0.05                     | 1.00±0.10                 | 0.77±0.15                         | 1.00±0.28              | 1.44±0.28                   | 0.045*<br>0.017 <sup>#</sup><br>0.048 <sup>△</sup><br>0.007 <sup>†</sup> |
| ATF4             | 0.97±0.09             | 0.65±0.06                  | 0.74±0.10                     | 0.99±0.03                 | 0.73±0.09                         | 1.08±0.17              | 1.36±0.09                   | 0.007*<br>0.045 <sup>#</sup><br>0.009 <sup>△</sup>                       |
| ATF6             | 0.89±0.23             | 0.66±0.15                  | 0.72±0.11                     | 1.00±0.07                 | 0.59±0.24                         | 0.97±0.14              | 2.47±0.71                   | 0.048 <sup>△</sup><br>0.022 <sup>†</sup>                                 |
| BCL-2            | 1.00±0.32             | 1.65±0.52                  | 1.23±0.36                     | 1.00±0.04                 | 1.44±0.57                         | 1.07±0.27              | 1.12±0.22                   | >0.05                                                                    |
| BAX              | 1.00±0.11             | 0.73±0.29                  | 0.79±0.24                     | 1.00±0.07                 | 0.81±0.24                         | 0.99±0.02              | 1.86±0.22                   | 0.017 <sup>†</sup>                                                       |
| BCL-2/BAX(%)     | 98.16±21.65           | 234.19±34.41               | 157.59±8.90                   | 100.04±3.44               | 173.73±1.61                       | 108.32±25.83           | 60.64±12.33                 | 0.000*<br>0.012 <sup>#</sup><br>0.001 <sup>△</sup><br>0.003 <sup>*</sup> |

\* No drug group VS. DHEA treated group, P<0.05;

<sup>#</sup> No drug group VS. RPE084 treated group, P<0.05;

<sup>△</sup> pcDNA3.1(+) group VS. pcDNA3.1(+) SIGMAR1 group,

<sup>†</sup> NC shRNA group VS. SIGMAR1 shRNA group, P<0.05.

**Supplementary Table 10. MTT assay results for KGN cells treated with different concentrations of TG ( $\bar{x} \pm s$ ).**

| TG(umol/L)         | 0 (n = 3)   | 0.25 (n = 3) | 0.5 (n = 3) | 1 (n = 3)  | 2 (n = 3)  | 4 (n = 3)  | P                                              |
|--------------------|-------------|--------------|-------------|------------|------------|------------|------------------------------------------------|
| Cell viability (%) | 100.00±1.59 | 97.00±1.44   | 95.68±0.83  | 77.17±2.06 | 72.90±1.96 | 70.75±3.47 | 0.072*<br>0.014#<br>0.000△<br>0.000†<br>0.000‡ |

\* 0.25µmol/L TG group VS. control group;

# 0.5µmol/L TG group VS. control group;

△ 1µmol/L TG group VS. control group;

† 2µmol/L TG group VS. control group;

‡ 4µmol/L TG group VS. control group;

**Supplementary Table 11. The ERS-related genes mRNA expression in TG- treated KGN cells ( $\bar{x} \pm s$ ) (each group n = 3).**

| TG(umol/L)   | 0 (n = 3)   | 0.5 (n = 3)  | 1 (n = 3)   | 2 (n = 3)  | 4 (n = 3)      | P                                    |
|--------------|-------------|--------------|-------------|------------|----------------|--------------------------------------|
| BIP          | 1.00±0.07   | 0.94±0.07    | 1.36±0.216  | 1.29±0.15  | 1.2459±0.26123 | 0.406*<br>0.049#<br>0.034△<br>0.187† |
| CHOP         | 1.00±0.05   | 0.96±0.06    | 1.26±0.05   | 1.30±0.16  | 1.28±0.16      | 0.490*<br>0.003#<br>0.038△<br>0.039† |
| BCL-2        | 1.02±0.05   | 0.98±0.08    | 0.82±0.04   | 0.78±0.06  | 0.75±0.02      | 0.534*<br>0.009#<br>0.008△<br>0.002† |
| BAX          | 0.99±0.05   | 0.91±0.06    | 1.18±0.19   | 0.99±0.15  | 0.96±0.11      | 0.135*<br>0.165#<br>0.926△<br>0.656† |
| BCL-2/BAX(%) | 102.23±4.80 | 108.46±15.83 | 70.89±14.20 | 79.99±7.27 | 78.95±10.15    | 0.550*<br>0.022#<br>0.012△<br>0.023† |

\* 0.5µmol/L TG group VS. control group;

# 1µmol/L TG group VS. control group;

△ 2µmol/L TG group VS. control group;

† 4µmol/L TG group VS. control group, P<0.05;

**Supplementary Table 12. The apoptosis index in differently treated KGN cells ( $\bar{x} \pm s$ ) (each group n = 3).**

|                                | <b>Control group<br/>(n = 3)</b> | <b>TG-induced<br/>group (n = 3)</b> | <b>TG+PRE-084<br/>group (n = 3)</b> | <b>TG +DHEA group<br/>(n = 3)</b> | <b>P</b>                               |
|--------------------------------|----------------------------------|-------------------------------------|-------------------------------------|-----------------------------------|----------------------------------------|
| Early stage apoptotic rate (%) | 6.21±1.17                        | 27.84±2.60                          | 14.13±1.37                          | 16.45±2.75                        | 0.000*<br>0.001#<br>0.006 <sup>△</sup> |
| Late stage apoptotic rate (%)  | 13.23±1.19                       | 17.34±3.19                          | 15.76±1.04                          | 15.62±1.44                        | >0.05                                  |
| Total Early apoptotic rate (%) | 19.44±1.80                       | 45.18±5.60                          | 29.89±2.01                          | 32.07±4.09                        | 0.002*<br>0.011#<br>0.031 <sup>△</sup> |

\* TG-induced group VS.control group, P<0.05;

# TG-induced group VS.TG+PRE-084 group, P<0.05;

△ TG-induced group VS. TG+DHEA group, P<0.05.

**Supplementary Table 13. Sigma-1 receptor protein levels in differently treated KGN cells ( $\bar{x} \pm s$ ) (each group n = 3).**

|                                  | <b>Control group<br/>(n = 3)</b> | <b>TG-induced group<br/>(n = 3)</b> | <b>TG+PRE-084<br/>group (n = 3)</b> | <b>TG +DHEA group<br/>(n = 3)</b> | <b>P</b>         |
|----------------------------------|----------------------------------|-------------------------------------|-------------------------------------|-----------------------------------|------------------|
| The level of sigma-1<br>receptor | 403.74±72.19                     | 317.31±55.55                        | 577.82±130.95                       | 449.91±52.78                      | 0.034*<br>0.040# |

\* TG-induced group VS.TG+PRE-084 group, P<0.05;

# TG-induced group VS. TG+DHEA group, P<0.05.

**Supplementary Table 14. The mRNA expression in KGN cells treated with different drugs ( $\bar{x} \pm s$ ) (each group n = 3).**

|                     | Control group<br>(n = 3) | TG-induced group<br>(n = 3) | TG+PRE-084 group<br>(n = 3) | TG +DHEA group<br>(n = 3) | P                                                  |
|---------------------|--------------------------|-----------------------------|-----------------------------|---------------------------|----------------------------------------------------|
| Sigma-1<br>receptor | 1.26±0.27                | 0.96±0.21                   | 1.50±0.14                   | 1.30±0.12                 | 0.021 <sup>#</sup>                                 |
| BIP                 | 0.70±0.14                | 1.05±0.16                   | 0.75±0.09                   | 0.7623±0.07               | 0.049*<br>0.046 <sup>#</sup><br>0.046 <sup>△</sup> |
| CHOP                | 0.71±0.14                | 0.99±0.04                   | 0.76±0.10                   | 0.76±0.11                 | 0.029*<br>0.021 <sup>#</sup><br>0.025 <sup>△</sup> |
| BCL-2               | 1.17±0.09                | 0.99±0.05                   | 1.12±0.03                   | 1.05±0.10                 | 0.034*<br>0.016 <sup>#</sup>                       |
| BAX                 | 0.75±0.07                | 0.97±0.16                   | 0.77±0.07                   | 0.71±0.10                 | >0.05                                              |
| BCL-2/<br>BAX(%)    | 157.28±25.42             | 103.72±20.77                | 147.20±15.13                | 148.70±14.51              | 0.048*<br>0.043 <sup>#</sup><br>0.037 <sup>△</sup> |
| JNK                 | 0.81±0.06                | 1.00±0.10                   | 0.90±0.18                   | 0.88±0.03                 | 0.038*                                             |
| caspase-12          | 0.86±0.04                | 1.01±0.08                   | 0.83±0.11                   | 0.86±0.07                 | 0.039*                                             |
| ATF4                | 0.88±0.03                | 0.98±0.09                   | 0.77±0.07                   | 0.73±0.12                 | 0.012*<br>0.034 <sup>#</sup><br>0.041 <sup>△</sup> |
| ATF6                | 0.74±0.05                | 0.96±0.12                   | 0.71±0.05                   | 0.85±0.05                 | 0.045*<br>0.029 <sup>#</sup>                       |

\* TG-induced group VS.control group, P<0.05;

<sup>#</sup> TG-induced group VS.TG+PRE-084 group, P<0.05;

<sup>△</sup> TG-induced group VS. TG+DHEA group, P<0.05.
